# Supplementary material for: Anatase porous titania nanosheets for resonant-gravimetric detection of ppb-level NO2 at room-temperature
Source: Royal Society of Chemistry journal article supplement (doi:10.1039/d1an00424g), 2021-01-01
Supplement: d1an00424g1.pdf [file d1an00424g1.pdf]

## Supporting Information

### Anatase porous titania nanosheets for resonant-gravimetric detection of ppb-level NO<sub>2</sub> at room-temperature

Jialin Yang<sup>a,b</sup>, Ding Wang<sup>a</sup>, Ming Li<sup>b,c,\*</sup>, Haitao Yu<sup>b</sup>, Pengcheng Xu<sup>b,c</sup> and Xinxin Li<sup>b,c,\*</sup>

<sup>a</sup>School of Material Science & Engineering, University of Shanghai for Science and Technology, Shanghai 200093, China.

<sup>b</sup>State Key Lab of Transducer Technology, Shanghai Institute of Microsystem and Information Technology, Chinese Academy of Sciences, Shanghai 200050, China. E-mail: liming01@mail.sim.ac.cn; xxli@mail.sim.ac.cn

<sup>c</sup>School of Microelectronics, University of Chinese Academy of Sciences, Beijing 100049, China.

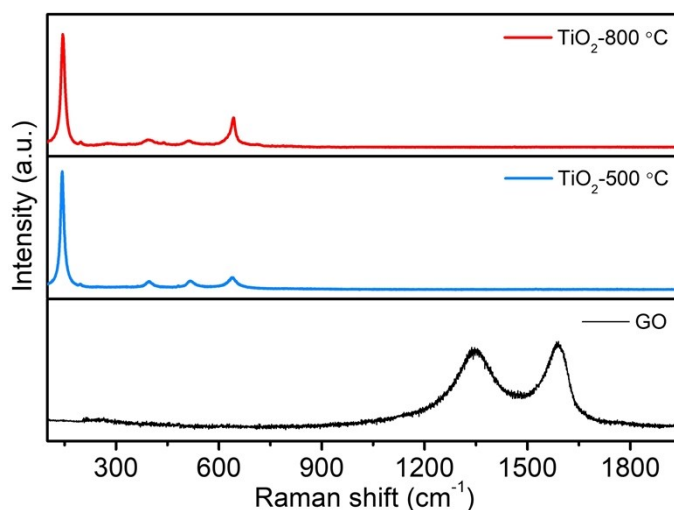

**Fig. S1.** Raman spectra of the PTNS synthesized at two different calcination temperatures of 500 and 800 °C compared with that of the GO templates.

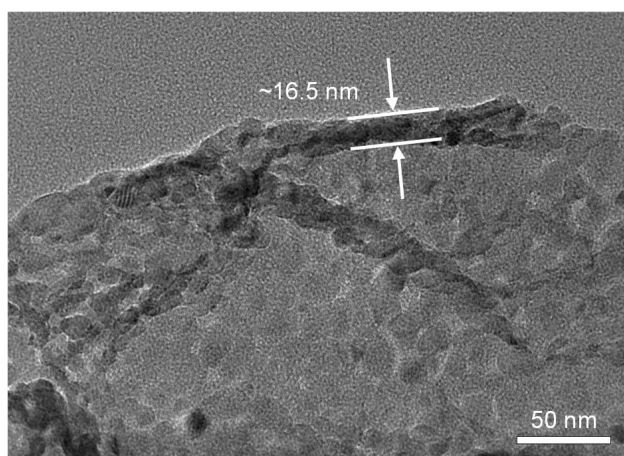

**Fig. S2.** Typical TEM image of the TiO<sub>2</sub>-500 °C sample for showing the thickness of PTNS.

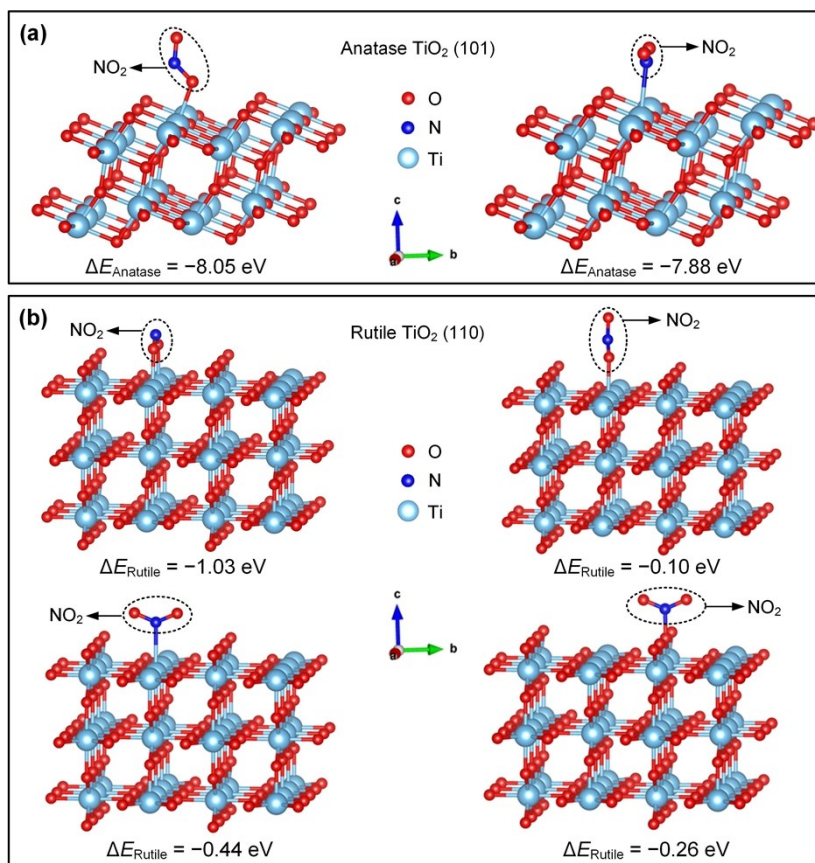

**Fig. S3.** The adsorption energy ( $\Delta E$ ) calculation results for one  $\text{NO}_2$  molecule adsorption on (a) anatase  $\text{TiO}_2$  (101) surface and (b) rutile  $\text{TiO}_2$  (110) surface.
